# Supplementary material for: FLJ10540 is associated with tumor progression in nasopharyngeal carcinomas and contributes to nasopharyngeal cell proliferation, and metastasis via osteopontin/CD44 pathway
Source: PubMed Central journal article supplement (PMC3419101; doi:10.1186/1479-5876-10-93), 2012-05-16
Supplement: 1479-5876-10-93-S1.pdf [file 1479-5876-10-93-S1.pdf]

**Up-regulated genes**

| Gene Symbol | Probeset ID  | Description                                                                           |
|-------------|--------------|---------------------------------------------------------------------------------------|
| ADA         | 204639_at    | adenosine deaminase                                                                   |
| ADAM22      | 213411_at    | ADAM metallopeptidase domain 22                                                       |
| ADAM23      | 244463_at    | ADAM metallopeptidase domain 23                                                       |
|             | 213808_at    |                                                                                       |
| ANGPT2      | 205572_at    | angiopoietin 2                                                                        |
| ANKRD29     | 238332_at    | ankyrin repeat domain 29                                                              |
| ANLN        | 1552619_a_at | anillin, actin binding protein (scraps homolog, Drosophila)                           |
|             | 222608_s_at  |                                                                                       |
| ASPM        | 219918_s_at  | asp (abnormal spindle)-like, microcephaly associated (Drosophila)                     |
| ATAD2       | 228401_at    | ATPase family, AAA domain containing 2                                                |
|             | 222740_at    |                                                                                       |
| ATP11C      | 226785_at    | ATPase, Class VI, type 11C                                                            |
| BCL2A1      | 205681_at    | BCL2-related protein A1                                                               |
| BIRC5       | 202095_s_at  | baculoviral IAP repeat-containing 5 (survivin)                                        |
| BRIP1       | 235609_at    | BRCA1 interacting protein C-terminal helicase 1                                       |
| BUB1B       | 203755_at    | BUB1 budding uninhibited by benzimidazoles 1 homolog beta (yeast)                     |
| C10orf3     | 218542_at    | chromosome 10 open reading frame 3 (FLJ10540)                                         |
| C20orf42    | 218796_at    | chromosome 20 open reading frame 42                                                   |
|             | 60474_at     |                                                                                       |
| C5orf13     | 201310_s_at  | chromosome 5 open reading frame 13                                                    |
| C6orf141    | 1552575_a_at | chromosome 6 open reading frame 141                                                   |
|             | 1554314_at   |                                                                                       |
| CALD1       | 201617_x_at  | caldesmon 1                                                                           |
|             | 212077_at    |                                                                                       |
| CCL2        | 216598_s_at  | chemokine (C-C motif) ligand 2                                                        |
| CCL8        | 214038_at    | chemokine (C-C motif) ligand 8                                                        |
| CCNB1       | 228729_at    | cyclin B1                                                                             |
| CCNE2       | 205034_at    | cyclin E2                                                                             |
| CD163       | 203645_s_at  | CD163 antigen                                                                         |
| CD200       | 209583_s_at  | CD200 antigen                                                                         |
| CDC2        | 203213_at    | Cell division cycle 2, G1 to S and G2 to M                                            |
| CDCA1       | 223381_at    | cell division cycle associated 1                                                      |
| CENPF       | 209172_s_at  | centromere protein F, 350/400ka (mitosin) ; centromere protein F, 350/400ka (mitosin) |
| CHI3L1      | 209395_at    | chitinase 3-like 1 (cartilage glycoprotein-39)                                        |
| CKS2        | 204170_s_at  | CDC28 protein kinase regulatory subunit 2                                             |
| CNTNAP2     | 219301_s_at  | contactin associated protein-like 2                                                   |
| COL15A1     | 203477_at    | collagen, type XV, alpha 1                                                            |
| COL1A1      | 1556499_s_at | collagen, type I, alpha 1                                                             |
| COL1A2      | 202404_s_at  | collagen, type I, alpha 2                                                             |
| COL22A1     | 228873_at    | collagen, type XXII, alpha 1                                                          |
| COL27A1     | 225288_at    | Collagen, type XXVII, alpha 1                                                         |
| COL3A1      | 201852_x_at  | collagen, type III, alpha 1 (Ehlers-Danlos syndrome type IV, autosomal dominant)      |
|             | 215076_s_at  |                                                                                       |
|             | 211161_s_at  |                                                                                       |
| COL4A1      | 211980_at    | collagen, type IV, alpha 1                                                            |
| COL4A2      | 211964_at    | collagen, type IV, alpha 2                                                            |
| COL5A2      | 221730_at    | collagen, type V, alpha 2                                                             |
|             | 221729_at    |                                                                                       |
| COL8A1      | 226237_at    | Collagen, type VIII, alpha 1                                                          |
| CSAG2       | 220445_s_at  | CSAG family, member 2                                                                 |
| CSE1L       | 201111_at    | CSE1 chromosome segregation 1-like (yeast)                                            |
| CSPG2       | 221731_x_at  | chondroitin sulfate proteoglycan 2 (versican)                                         |
|             | 204619_s_at  |                                                                                       |
| CXCL10      | 204533_at    | chemokine (C-X-C motif) ligand 10                                                     |
| CXCL11      | 210163_at    | chemokine (C-X-C motif) ligand 11                                                     |
|             | 211122_s_at  |                                                                                       |
| CXCL9       | 203915_at    | chemokine (C-X-C motif) ligand 9                                                      |
| DEPDC1B     | 226980_at    | DEP domain containing 1B                                                              |
| DMD         | 203881_s_at  | dystrophin (muscular dystrophy, Duchenne and Becker types)                            |
| DNA2L       | 213647_at    | DNA2 DNA replication helicase 2-like (yeast)                                          |
| DTL         | 222680_s_at  | denticleless homolog (Drosophila)                                                     |
|             | 218585_s_at  |                                                                                       |
| ECT2        | 219787_s_at  | epithelial cell transforming sequence 2 oncogene                                      |
| ESCO2       | 235178_x_at  | establishment of cohesion 1 homolog 2 (S. cerevisiae)                                 |
| FANCL       | 227854_at    | Fanconi anemia, complementation group L                                               |
| FBN1        | 202766_s_at  | fibrillin 1 (Marfan syndrome)                                                         |
| FIGNL1      | 222843_at    | fidgetin-like 1                                                                       |

|          |              |                                                                                                                    |
|----------|--------------|--------------------------------------------------------------------------------------------------------------------|
| FLJ11029 | 228273_at    | Hypothetical protein FLJ11029                                                                                      |
| FLJ12505 | 235343_at    | Hypothetical protein FLJ12505                                                                                      |
| FLJ20641 | 227928_at    | hypothetical protein FLJ20641                                                                                      |
| FMNL2    | 226184_at    | formin-like 2                                                                                                      |
| FN1      | 216442_x_at  | fibronectin 1                                                                                                      |
|          | 210495_x_at  |                                                                                                                    |
|          | 212464_s_at  |                                                                                                                    |
|          | 211719_x_at  |                                                                                                                    |
| FRAS1    | 226145_s_at  | Fraser syndrome 1                                                                                                  |
| FZD7     | 203706_s_at  | frizzled homolog 7 (Drosophila)                                                                                    |
| GAD1     | 205278_at    | glutamate decarboxylase 1 (brain, 67kDa)                                                                           |
| GALNT11  | 219013_at    | UDP-N-acetyl-alpha-D-galactosamine:polypeptide N-acetylgalactosaminyltransferase 11 (GalNAc-T11)                   |
| GHR      | 205498_at    | growth hormone receptor                                                                                            |
| GJA1     | 201667_at    | gap junction protein, alpha 1, 43kDa (connexin 43)                                                                 |
| GLS      | 221510_s_at  | glutaminase                                                                                                        |
| GMNN     | 218350_s_at  | geminin, DNA replication inhibitor                                                                                 |
| GRB10    | 209409_at    | growth factor receptor-bound protein 10                                                                            |
| GREM1    | 218469_at    | gremlin 1, cysteine knot superfamily, homolog (Xenopus laevis)                                                     |
|          | 218468_s_at  |                                                                                                                    |
| GZMB     | 210164_at    | granzyme B (granzyme 2, cytotoxic T-lymphocyte-associated serine esterase 1) ; granzyme B (granzyme 2,             |
| HCAP-G   | 218663_at    | chromosome condensation protein G                                                                                  |
|          | 218662_s_at  |                                                                                                                    |
| HELLS    | 220085_at    | helicase, lymphoid-specific                                                                                        |
|          | 242890_at    |                                                                                                                    |
| HMMR     | 207165_at    | hyaluronan-mediated motility receptor (RHAMM)                                                                      |
| HOXA3    | 235521_at    | homeo box A3                                                                                                       |
| HOXC6    | 206858_s_at  | homeo box C6                                                                                                       |
| IFI44L   | 204439_at    | interferon-induced protein 44-like                                                                                 |
| IFIT1    | 203153_at    | interferon-induced protein with tetratricopeptide repeats 1 ; interferon-induced protein with tetratricopeptide    |
| IFIT2    | 226757_at    | interferon-induced protein with tetratricopeptide repeats 2                                                        |
| IFIT3    | 229450_at    | interferon-induced protein with tetratricopeptide repeats 3                                                        |
| IMP-3    | 203820_s_at  | IGF-II mRNA-binding protein 3                                                                                      |
| IMP-3    | 203819_s_at  | IGF-II mRNA-binding protein 3                                                                                      |
| INHBA    | 227140_at    | Inhibin, beta A (activin A, activin AB alpha polypeptide)                                                          |
| INSM1    | 206502_s_at  | insulinoma-associated 1                                                                                            |
| IQGAP3   | 229490_s_at  | IQ motif containing GTPase activating protein 3                                                                    |
| ITGAV    | 236251_at    | Integrin, alpha V (vitronectin receptor, alpha polypeptide, antigen CD51)                                          |
|          | 232797_at    |                                                                                                                    |
| ITGB6    | 226535_at    | integrin, beta 6                                                                                                   |
| KIAA0101 | 202503_s_at  | KIAA0101                                                                                                           |
| KIAA0286 | 212621_at    | KIAA0286 protein                                                                                                   |
| KIF11    | 204444_at    | kinesin family member 11                                                                                           |
| KIF14    | 206364_at    | kinesin family member 14                                                                                           |
|          | 236641_at    |                                                                                                                    |
| KIF23    | 204709_s_at  | kinesin family member 23                                                                                           |
| KLHL23   | 213610_s_at  | kelch-like 23 (Drosophila)                                                                                         |
| KNTC2    | 204162_at    | kinetochore associated 2                                                                                           |
| LAMB1    | 211651_s_at  | laminin, beta 1 ; laminin, beta 1                                                                                  |
|          | 201505_at    |                                                                                                                    |
| LGALS1   | 201105_at    | lectin, galactoside-binding, soluble, 1 (galectin 1)                                                               |
| LHX2     | 206140_at    | LIM homeobox 2                                                                                                     |
| MAC30    | 212281_s_at  | hypothetical protein MAC30                                                                                         |
| MAD2L1   | 203362_s_at  | MAD2 mitotic arrest deficient-like 1 (yeast)                                                                       |
| MASTL    | 228468_at    | microtubule associated serine/threonine kinase-like                                                                |
| MCM8     | 224320_s_at  | MCM8 minichromosome maintenance deficient 8 (S. cerevisiae)                                                        |
| MELK     | 204825_at    | maternal embryonic leucine zipper kinase                                                                           |
| MLF1IP   | 218883_s_at  | MLF1 interacting protein                                                                                           |
|          | 229305_at    |                                                                                                                    |
| MMP1     | 204475_at    | matrix metalloproteinase 1 (interstitial collagenase)                                                              |
| MMP12    | 204580_at    | matrix metalloproteinase 12 (macrophage elastase)                                                                  |
| MMP3     | 205828_at    | matrix metalloproteinase 3 (stromelysin 1, progelatinase)                                                          |
| MS4A4A   | 219607_s_at  | membrane-spanning 4-domains, subfamily A, member 4                                                                 |
| NEDD1    | 1560116_a_at | neural precursor cell expressed, developmentally down-regulated 1                                                  |
|          | 1552417_a_at |                                                                                                                    |
|          | 234984_at    |                                                                                                                    |
| NFE2L3   | 204702_s_at  | nuclear factor (erythroid-derived 2)-like 3                                                                        |
| NID1     | 202007_at    | nidogen 1                                                                                                          |
| NOV      | 214321_at    | nephroblastoma overexpressed gene                                                                                  |
| NPL      | 221210_s_at  | N-acetylneuraminic acid pyruvate lyase (dihydrodipicolinate synthase) ; N-acetylneuraminic acid pyruvate lyase (di |

|          |              |                                                                                                               |
|----------|--------------|---------------------------------------------------------------------------------------------------------------|
|          | 240440_at    |                                                                                                               |
| NRXN1    | 228547_at    | neurexin 1                                                                                                    |
| NTRK2    | 221796_at    | neurotrophic tyrosine kinase, receptor, type 2                                                                |
| NUSAP1   | 218039_at    | nucleolar and spindle associated protein 1                                                                    |
| OVOS2    | 228245_s_at  | ovostatin 2                                                                                                   |
| PAICS    | 201014_s_at  | phosphoribosylaminoimidazole carboxylase, phosphoribosylaminoimidazole succinocarboxamide synthetase          |
| PAPSS2   | 203058_s_at  | 3'-phosphoadenosine 5'-phosphosulfate synthase 2                                                              |
|          | 203060_s_at  |                                                                                                               |
| PBK      | 219148_at    | PDZ binding kinase                                                                                            |
| PCOLCE2  | 219295_s_at  | procollagen C-endopeptidase enhancer 2                                                                        |
| PLA2G7   | 206214_at    | phospholipase A2, group VII (platelet-activating factor acetylhydrolase, plasma) ; phospholipase A2, group    |
| PLAU     | 205479_s_at  | plasminogen activator, urokinase                                                                              |
| PMAIP1   | 204285_s_at  | phorbol-12-myristate-13-acetate-induced protein 1                                                             |
|          | 204286_s_at  |                                                                                                               |
| POSTN    | 1555778_a_at | periostin, osteoblast specific factor                                                                         |
|          | 210809_s_at  |                                                                                                               |
| PRC1     | 218009_s_at  | protein regulator of cytokinesis 1                                                                            |
| PRRX1    | 238852_at    | Paired related homeobox 1                                                                                     |
| PSAT1    | 223062_s_at  | phosphoserine aminotransferase 1                                                                              |
| PSF1     | 206102_at    | DNA replication complex GINS protein PSF1                                                                     |
| PTGS2    | 1554997_a_at | prostaglandin-endoperoxide synthase 2 (prostaglandin G/H synthase and cyclooxygenase)                         |
|          | 204748_at    |                                                                                                               |
| RAD51AP1 | 204146_at    | RAD51 associated protein 1                                                                                    |
| RCN1     | 201063_at    | reticulocalbin 1, EF-hand calcium binding domain                                                              |
| ROBO1    | 1558714_at   | Roundabout, axon guidance receptor, homolog 1 (Drosophila)                                                    |
| RRM2     | 201890_at    | ribonucleotide reductase M2 polypeptide                                                                       |
| RSAD2    | 242625_at    | radical S-adenosyl methionine domain containing 2                                                             |
| SCNN1G   | 241436_at    | sodium channel, nonvoltage-gated 1, gamma                                                                     |
| SLC39A14 | 212110_at    | solute carrier family 39 (zinc transporter), member 14                                                        |
| SOCS1    | 210001_s_at  | suppressor of cytokine signaling 1                                                                            |
| SPARC    | 200665_s_at  | secreted protein, acidic, cysteine-rich (osteonectin) ; secreted protein, acidic, cysteine-rich (osteonectin) |
| SPP1     | 209875_s_at  | secreted phosphoprotein 1 (osteopontin, bone sialoprotein I, early T-lymphocyte activation 1)                 |
| STAR     | 204548_at    | steroidogenic acute regulator                                                                                 |
| STK6     | 208079_s_at  | serine/threonine kinase 6                                                                                     |
| SULF1    | 212353_at    | sulfatase 1                                                                                                   |
| SYNPO2   | 227662_at    | synaptopodin 2                                                                                                |
|          | 225895_at    |                                                                                                               |
| TMPO     | 203432_at    | thymopoietin                                                                                                  |
| TNFAIP6  | 206025_s_at  | tumor necrosis factor, alpha-induced protein 6                                                                |
|          | 206026_s_at  |                                                                                                               |
| TNFSF4   | 207426_s_at  | tumor necrosis factor (ligand) superfamily, member 4 (tax-transcriptionally activated glycoprotein 1, 34kDa)  |
| TOP2A    | 201291_s_at  | topoisomerase (DNA) II alpha 170kDa                                                                           |
|          | 201292_at    |                                                                                                               |
| TYMS     | 202589_at    | thymidylate synthetase                                                                                        |
| VRK2     | 243299_at    | Vaccinia related kinase 2                                                                                     |
| XG       | 1554062_at   | Xg blood group (pseudoautosomal boundary-divided on the X chromosome)                                         |
| ZIC2     | 223642_at    | Zic family member 2 (odd-paired homolog, Drosophila)                                                          |
| ZNF367   | 229551_x_at  | zinc finger protein 367                                                                                       |
|          | 1563414_at   | Full length insert cDNA clone YW28F05                                                                         |
|          | 229242_at    | Transcribed locus                                                                                             |
|          | 230782_at    | CDNA FLJ33419 fis, clone BRACE2019877                                                                         |
|          | 227498_at    | CDNA FLJ11723 fis, clone HEMBA1005314                                                                         |
|          | 227350_at    | CDNA FLJ11381 fis, clone HEMBA1000501                                                                         |
|          | 242881_x_at  | LOC440156                                                                                                     |
|          | 230312_at    | CDNA FLJ45482 fis, clone BRTHA2001953                                                                         |
|          | 227623_at    | MRNA; cDNA DKFZp313C0240 (from clone DKFZp313C0240)                                                           |
|          | 227921_at    |                                                                                                               |

#### Down-regulated genes

| Gene Symbol       | Probeset ID  | Description                                                                                                  |
|-------------------|--------------|--------------------------------------------------------------------------------------------------------------|
| ABCA13            | 1553605_a_at | ATP-binding cassette, sub-family A (ABC1), member 13                                                         |
|                   | 1553604_at   |                                                                                                              |
| ADH1A ; ADH1B ; A | 206262_at    | alcohol dehydrogenase 1A (class I, alpha polypeptide) ; alcohol dehydrogenase 1B (class I, beta polypeptide) |
| ADH7              | 210505_at    | alcohol dehydrogenase 7 (class IV), mu or sigma polypeptide                                                  |
| ADSSL1            | 226325_at    | adenylosuccinate synthase like 1                                                                             |
| AGBL2             | 220390_at    | ATP/GTP binding protein-like 2                                                                               |
| AGR2              | 209173_at    | anterior gradient 2 homolog (Xenopus laevis)                                                                 |

|                 |              |                                                                                                              |
|-----------------|--------------|--------------------------------------------------------------------------------------------------------------|
| AK7             | 1553734_at   | adenylate kinase 7                                                                                           |
| AKAP14          | 237281_at    | A kinase (PRKA) anchor protein 14                                                                            |
|                 | 237282_s_at  |                                                                                                              |
| AKR1C3          | 209160_at    | aldo-keto reductase family 1, member C3 (3-alpha hydroxysteroid dehydrogenase, type II)                      |
| ALDH1A1         | 212224_at    | aldehyde dehydrogenase 1 family, member A1                                                                   |
| ALDH1A3         | 203180_at    | aldehyde dehydrogenase 1 family, member A3                                                                   |
| ALDH3A1         | 205623_at    | aldehyde dehydrogenase 3 family, member A1                                                                   |
| ALDH3B1         | 205640_at    | aldehyde dehydrogenase 3 family, member B1                                                                   |
| AMY1A ; AMY1B ; | 208498_s_at  | amylase, alpha 1A; salivary ; amylase, alpha 1B; salivary ; amylase, alpha 1C; salivary ; amylase, alpha 2A; |
| ANXA1           | 201012_at    | annexin A1                                                                                                   |
| AQP3            | 39248_at     | aquaporin 3                                                                                                  |
| ARHGAP18        | 225166_at    | Rho GTPase activating protein 18                                                                             |
| ARMC2           | 223866_at    | armadillo repeat containing 2                                                                                |
| ARMC3           | 240275_at    | armadillo repeat containing 3                                                                                |
| ARMC4           | 223794_at    | armadillo repeat containing 4                                                                                |
| ATP12A          | 207367_at    | ATPase, H+/K+ transporting, nongastric, alpha polypeptide                                                    |
| B3GNT7          | 1555963_x_at | UDP-GlcNAc:betaGal beta-1,3-N-acetylglucosaminyltransferase 7                                                |
|                 | 1555962_at   |                                                                                                              |
| BANK1           | 219667_s_at  | B-cell scaffold protein with ankyrin repeats 1                                                               |
| BCAS1           | 204378_at    | breast carcinoma amplified sequence 1                                                                        |
| BCMP11          | 228241_at    | breast cancer membrane protein 11                                                                            |
| C10orf63        | 237314_at    | chromosome 10 open reading frame 63                                                                          |
| C10orf79        | 231084_at    | chromosome 10 open reading frame 79                                                                          |
| C10orf81        | 219857_at    | chromosome 10 open reading frame 81                                                                          |
| C14orf45        | 220173_at    | chromosome 14 open reading frame 45                                                                          |
| C14orf78        | 212992_at    | chromosome 14 open reading frame 78                                                                          |
| C19orf33        | 223631_s_at  | chromosome 19 open reading frame 33                                                                          |
| C1orf102        | 227359_at    | chromosome 1 open reading frame 102                                                                          |
| C1orf110        | 1554960_at   | chromosome 1 open reading frame 110                                                                          |
| C1orf114        | 206721_at    | chromosome 1 open reading frame 114                                                                          |
| C1orf116        | 219476_at    | chromosome 1 open reading frame 116                                                                          |
|                 | 228865_at    |                                                                                                              |
| C1orf173        | 229973_at    | chromosome 1 open reading frame 173                                                                          |
| C1orf192        | 231077_at    | chromosome 1 open reading frame 192                                                                          |
| C1orf87         | 236710_at    | chromosome 1 open reading frame 87                                                                           |
| C1orf88         | 228100_at    | chromosome 1 open reading frame 88                                                                           |
| C20orf114       | 226067_at    | chromosome 20 open reading frame 114                                                                         |
| C20orf85        | 229542_at    | chromosome 20 open reading frame 85                                                                          |
| C3orf15         | 236222_at    | chromosome 3 open reading frame 15                                                                           |
| C6orf103        | 220614_s_at  | chromosome 6 open reading frame 103                                                                          |
| C6orf118        | 232777_s_at  | chromosome 6 open reading frame 118                                                                          |
| C6orf165        | 230273_at    | chromosome 6 open reading frame 165                                                                          |
| C6orf206        | 230695_s_at  | chromosome 6 open reading frame 206                                                                          |
| C6orf32         | 209829_at    | chromosome 6 open reading frame 32                                                                           |
| C8orf47         | 1552390_a_at | chromosome 8 open reading frame 47                                                                           |
| C9orf116        | 59437_at     | chromosome 9 open reading frame 116                                                                          |
|                 | 221946_at    |                                                                                                              |
| C9orf18         | 229976_at    | chromosome 9 open reading frame 18                                                                           |
| C9orf24         | 229012_at    | chromosome 9 open reading frame 24                                                                           |
| C9orf26         | 209821_at    | chromosome 9 open reading frame 26 (NF-HEV)                                                                  |
| CALML4          | 221879_at    | calmodulin-like 4                                                                                            |
|                 | 64408_s_at   |                                                                                                              |
| CAPN14          | 1557321_a_at | calpain 14                                                                                                   |
| CAPS            | 231729_s_at  | calcyphosine                                                                                                 |
|                 | 226424_at    |                                                                                                              |
|                 | 231728_at    |                                                                                                              |
| CAPS2           | 224370_s_at  | calcyphosine 2 ; calcyphosine 2                                                                              |
| CAPSL           | 236085_at    | calcyphosine-like                                                                                            |
| CASC1           | 220168_at    | cancer susceptibility candidate 1                                                                            |
| CCDC11          | 1552326_a_at | coiled-coil domain containing 11                                                                             |
|                 | 1552325_at   |                                                                                                              |
| CCDC17          | 236320_at    | coiled-coil domain containing 17                                                                             |
| CCDC19          | 220308_at    | coiled-coil domain containing 19                                                                             |
| CDH26           | 232306_at    | cadherin-like 26                                                                                             |
|                 | 233663_s_at  |                                                                                                              |
| CDS1            | 205709_s_at  | CDP-diacylglycerol synthase (phosphatidate cytidyltransferase) 1                                             |
| CEACAM5         | 201884_at    | carcinoembryonic antigen-related cell adhesion molecule 5                                                    |
| CEACAM6         | 211657_at    | carcinoembryonic antigen-related cell adhesion molecule 6 (non-specific cross reacting antigen) ; carcinoem  |
|                 | 203757_s_at  |                                                                                                              |

|               |              |                                                                                                               |
|---------------|--------------|---------------------------------------------------------------------------------------------------------------|
| CES1          | 209616_s_at  | carboxylesterase 1 (monocyte/macrophage serine esterase 1)                                                    |
| CGI-38        | 218876_at    | brain specific protein ; brain specific protein                                                               |
| CH25H         | 206932_at    | cholesterol 25-hydroxylase                                                                                    |
| CHL1          | 204591_at    | cell adhesion molecule with homology to L1CAM (close homolog of L1)                                           |
| CHST5         | 219182_at    | carbohydrate (N-acetylglucosamine 6-O) sulfotransferase 5                                                     |
|               | 64900_at     |                                                                                                               |
| CHST6         | 223786_at    | carbohydrate (N-acetylglucosamine 6-O) sulfotransferase 6                                                     |
| CHST9         | 223737_x_at  | carbohydrate (N-acetylgalactosamine 4-O) sulfotransferase 9                                                   |
|               | 224400_s_at  |                                                                                                               |
| CKB           | 200884_at    | creatine kinase, brain                                                                                        |
| CLCA2         | 217528_at    | chloride channel, calcium activated, family member 2                                                          |
| CLCA4         | 220026_at    | chloride channel, calcium activated, family member 4                                                          |
| CLDN10        | 205328_at    | claudin 10                                                                                                    |
| CLDN23        | 228707_at    | claudin 23                                                                                                    |
| CLIC3         | 219529_at    | chloride intracellular channel 3                                                                              |
| CLIC6         | 227742_at    | chloride intracellular channel 6                                                                              |
| CLMN          | 221042_s_at  | calmin (calponin-like, transmembrane)                                                                         |
| CLU           | 208792_s_at  | clusterin (complement lysis inhibitor, SP-40,40, sulfated glycoprotein 2, testosterone-repressed prostate mes |
|               | 208791_at    |                                                                                                               |
|               | 222043_at    |                                                                                                               |
| CNFN          | 224329_s_at  | cornifelin ; cornifelin                                                                                       |
| CR2           | 205544_s_at  | complement component (3d/Epstein Barr virus) receptor 2                                                       |
| CRIP1         | 205081_at    | cysteine-rich protein 1 (intestinal)                                                                          |
| CTGF          | 209101_at    | connective tissue growth factor                                                                               |
| CXCL1         | 204470_at    | chemokine (C-X-C motif) ligand 1 (melanoma growth stimulating activity, alpha)                                |
| CXCL14        | 218002_s_at  | chemokine (C-X-C motif) ligand 14                                                                             |
|               | 222484_s_at  |                                                                                                               |
| CXorf41       | 231389_at    | chromosome X open reading frame 41                                                                            |
| CYP4B1        | 210096_at    | cytochrome P450, family 4, subfamily B, polypeptide 1                                                         |
| DAF           | 201925_s_at  | decay accelerating factor for complement (CD55, Cromer blood group system)                                    |
|               | 201926_s_at  |                                                                                                               |
|               | 1555950_a_at |                                                                                                               |
| DENND2C       | 230769_at    | DENN/MADD domain containing 2C                                                                                |
| DHCR24        | 200862_at    | 24-dehydrocholesterol reductase                                                                               |
| DHRS9         | 219799_s_at  | dehydrogenase/reductase (SDR family) member 9                                                                 |
|               | 224009_x_at  |                                                                                                               |
|               | 223952_x_at  |                                                                                                               |
| DKFZP434H0115 | 223924_at    | hypothetical protein DKFZp434H0115                                                                            |
| DKFZp666G057  | 1556158_at   | hypothetical protein DKFZp666G057                                                                             |
| DKFZp761N1114 | 229254_at    | hypothetical protein DKFZp761N1114                                                                            |
| DNAH5         | 232381_s_at  | dynein, axonemal, heavy polypeptide 5                                                                         |
| DNAH7         | 214222_at    | dynein, axonemal, heavy polypeptide 7                                                                         |
| DNAH9         | 240857_at    | dynein, axonemal, heavy polypeptide 9                                                                         |
|               | 207959_s_at  |                                                                                                               |
| DNAI2         | 220636_at    | dynein, axonemal, intermediate polypeptide 2                                                                  |
| DNAJA4        | 225061_at    | DnaJ (Hsp40) homolog, subfamily A, member 4                                                                   |
| DNALI1        | 227081_at    | dynein, axonemal, light intermediate polypeptide 1                                                            |
|               | 205186_at    |                                                                                                               |
| DNCH2         | 219469_at    | dynein, cytoplasmic, heavy polypeptide 2                                                                      |
| DNCL2B        | 238116_at    | dynein, cytoplasmic, light polypeptide 2B                                                                     |
| DNER          | 226281_at    | delta-notch-like EGF repeat-containing transmembrane                                                          |
| DUOX1         | 219597_s_at  | dual oxidase 1                                                                                                |
| DUOX2         | 219727_at    | dual oxidase 2                                                                                                |
| DUSP1         | 201041_s_at  | dual specificity phosphatase 1                                                                                |
| DYX1C1        | 235273_at    | dyslexia susceptibility 1 candidate 1                                                                         |
| ECRG4         | 223623_at    | esophageal cancer related gene 4 protein                                                                      |
| EFHB          | 239477_at    | EF-hand domain family, member B                                                                               |
| EFHC1         | 219833_s_at  | EF-hand domain (C-terminal) containing 1                                                                      |
| EFHC2         | 220591_s_at  | EF-hand domain (C-terminal) containing 2                                                                      |
| ELF3          | 229842_at    | E74-like factor 3 (ets domain transcription factor, epithelial-specific )                                     |
|               | 210827_s_at  |                                                                                                               |
|               | 201510_at    |                                                                                                               |
| ELL3          | 219518_s_at  | elongation factor RNA polymerase II-like 3                                                                    |
| EPAS1         | 200878_at    | endothelial PAS domain protein 1                                                                              |
| EPPK1         | 232164_s_at  | epiplakin 1                                                                                                   |
|               | 232165_at    |                                                                                                               |
| F3            | 204363_at    | coagulation factor III (thromboplastin, tissue factor)                                                        |
| FAM3B         | 227194_at    | family with sequence similarity 3, member B                                                                   |
| FAM3D         | 227676_at    | family with sequence similarity 3, member D                                                                   |

|                   |              |                                                                                                              |
|-------------------|--------------|--------------------------------------------------------------------------------------------------------------|
| FAM81B            | 240065_at    | family with sequence similarity 81, member B                                                                 |
| FANK1             | 232968_at    | fibronectin type III and ankyrin repeat domains 1                                                            |
| FBXO15            | 231472_at    | F-box protein 15                                                                                             |
| FCRL4             | 224403_at    | Fc receptor-like 4 ; Fc receptor-like 4                                                                      |
| FLJ13841          | 219995_s_at  | hypothetical protein FLJ13841                                                                                |
| FLJ20366          | 218692_at    | hypothetical protein FLJ20366                                                                                |
| FLJ22662          | 218454_at    | hypothetical protein FLJ22662                                                                                |
| FLJ23049          | 220269_at    | hypothetical protein FLJ23049                                                                                |
| FLJ23514          | 220389_at    | hypothetical protein FLJ23514                                                                                |
| FLJ23577          | 232745_x_at  | KPL2 protein                                                                                                 |
| FLJ23834          | 235650_at    | hypothetical protein FLJ23834                                                                                |
| FLJ32926          | 233157_x_at  | hypothetical protein FLJ32926                                                                                |
| FLJ34512          | 236745_at    | hypothetical protein FLJ34512                                                                                |
| FLJ35834          | 1568924_a_at | hypothetical protein FLJ35834                                                                                |
| FLJ37927          | 240161_s_at  | CDC20-like protein                                                                                           |
| FLJ40083          | 243758_at    | hypothetical protein FLJ40083                                                                                |
| FLJ40427          | 243802_at    | hypothetical protein FLJ40427                                                                                |
| FLJ40873          | 1553635_s_at | Hypothetical protein LOC200132                                                                               |
| FLJ40919          | 1556711_at   | hypothetical protein FLJ40919                                                                                |
| FLJ46154          | 232603_at    | FLJ46154 protein                                                                                             |
| FLJ46266          | 1568606_at   | FLJ46266 protein                                                                                             |
| FLJ46675          | 239499_at    | FLJ46675 protein                                                                                             |
| FLJ90575          | 238682_at    | hypothetical protein FLJ90575                                                                                |
| GABRP             | 205044_at    | gamma-aminobutyric acid (GABA) A receptor, pi                                                                |
| GCNT3             | 219508_at    | glucosaminyl (N-acetyl) transferase 3, mucin type                                                            |
| GDA               | 224209_s_at  | guanine deaminase                                                                                            |
| GNE               | 205042_at    | glucosamine (UDP-N-acetyl)-2-epimerase/N-acetylmannosamine kinase                                            |
| GPR110            | 235988_at    | G protein-coupled receptor 110                                                                               |
| GSTA1             | 203924_at    | glutathione S-transferase A1                                                                                 |
| GSTA3             | 222102_at    | glutathione S-transferase A3                                                                                 |
| GULP1             | 204237_at    | GULP, engulfment adaptor PTB domain containing 1                                                             |
|                   | 204235_s_at  |                                                                                                              |
| H19               | 224646_x_at  | H19, imprinted maternally expressed untranslated mRNA                                                        |
| H2AFJ             | 225245_x_at  | H2A histone family, member J                                                                                 |
| HOP               | 211597_s_at  | homeodomain-only protein ; homeodomain-only protein                                                          |
| HRASLS2           | 221122_at    | HRAS-like suppressor 2                                                                                       |
| HS3ST6 ; LOC34246 | 239547_at    | heparan sulfate (glucosamine) 3-O-sulfotransferase 6 ; similar to c439A6.1 (novel protein similar to heparan |
| HSPB8             | 221667_s_at  | heat shock 22kDa protein 8                                                                                   |
| HSPC065           | 222890_at    | HSPC065 protein                                                                                              |
| HYDIN             | 232984_at    | hydrocephalus inducing                                                                                       |
| IGHD              | 213674_x_at  | immunoglobulin heavy constant delta                                                                          |
| IGHM              | 212827_at    | immunoglobulin heavy constant mu ; immunoglobulin heavy constant mu                                          |
| IPO9              | 225728_at    | Importin 9                                                                                                   |
| IQCA              | 238584_at    | IQ motif containing with AAA domain                                                                          |
| IQCD              | 1552540_s_at | IQ motif containing D                                                                                        |
|                   | 221185_s_at  |                                                                                                              |
| KCNE1             | 236407_at    | potassium voltage-gated channel, Isk-related family, member 1                                                |
| KCNRG             | 240288_at    | potassium channel regulator                                                                                  |
| KIAA0500          | 213839_at    | KIAA0500 protein                                                                                             |
| KIF21A            | 226003_at    | kinesin family member 21A                                                                                    |
| KRT13             | 207935_s_at  | keratin 13                                                                                                   |
| KRT14             | 209351_at    | keratin 14 (epidermolysis bullosa simplex, Dowling-Meara, Koebner)                                           |
| KRT23             | 218963_s_at  | keratin 23 (histone deacetylase inducible)                                                                   |
| KRT4              | 213240_s_at  | keratin 4                                                                                                    |
| KRT7              | 209016_s_at  | keratin 7                                                                                                    |
| LCN2              | 212531_at    | lipocalin 2 (oncogene 24p3)                                                                                  |
| LMO2              | 204249_s_at  | LIM domain only 2 (rhombotin-like 1)                                                                         |
| LOC127003         | 231044_at    | similar to CG5435-PA                                                                                         |
| LOC128153         | 230763_at    | hypothetical protein BC014608                                                                                |
| LOC129881         | 236909_at    | hypothetical LOC129881                                                                                       |
| LOC132203         | 239150_at    | similar to hypothetical protein A430083B19                                                                   |
| LOC134121         | 239722_at    | hypothetical protein LOC134121                                                                               |
| LOC136288         | 1557636_a_at | hypothetical protein LOC136288                                                                               |
| LOC138255         | 243610_at    | OTTHUMP00000021439                                                                                           |
| LOC151438         | 1560679_at   | hypothetical protein LOC151438                                                                               |
| LOC222171         | 226961_at    | hypothetical protein LOC222171                                                                               |
| LOC222967 ; LOC28 | 1557417_s_at | hypothetical protein LOC222967 ; hypothetical protein LOC285927                                              |
| LOC283663         | 230245_s_at  | hypothetical protein LOC283663                                                                               |
| LOC401551         | 243900_at    | similar to hypothetical protein FLJ25955                                                                     |

|                   |              |                                                                                                   |
|-------------------|--------------|---------------------------------------------------------------------------------------------------|
| LOC441054         | 236915_at    | hypothetical protein LOC441054                                                                    |
| LOC90557 ; DKFZp4 | 227966_s_at  | hypothetical protein BC016861 ; hypothetical protein DKFZp434E2321                                |
| LRP11             | 225060_at    | low density lipoprotein receptor-related protein 11                                               |
| LRRC34            | 236918_s_at  | leucine rich repeat containing 34                                                                 |
|                   | 236917_at    |                                                                                                   |
| LRRC46            | 230601_s_at  | leucine rich repeat containing 46                                                                 |
| LRRC48            | 208140_s_at  | leucine rich repeat containing 48 ; leucine rich repeat containing 48                             |
| LTB4DH            | 231897_at    | leukotriene B4 12-hydroxydehydrogenase                                                            |
| LTF               | 202018_s_at  | lactotransferrin                                                                                  |
| MAL               | 204777_s_at  | mal, T-cell differentiation protein                                                               |
| MDAC1             | 1552594_at   | MDAC1                                                                                             |
| MDH1B             | 1558077_s_at | malate dehydrogenase 1B, NAD (soluble)                                                            |
| MGC13040          | 224463_s_at  | hypothetical protein MGC13040 ; hypothetical protein MGC13040                                     |
|                   | 241198_s_at  |                                                                                                   |
| MGC14839          | 238805_at    | similar to RIKEN cDNA 2310030G06 gene                                                             |
| MGC16186          | 239733_at    | hypothetical protein MGC16186                                                                     |
| MGC16372          | 231133_at    | CG10958-like                                                                                      |
| MGC26733          | 1562371_s_at | hypothetical protein MGC26733                                                                     |
| MGC26963          | 227038_at    | hypothetical protein MGC26963                                                                     |
| MGC35043          | 231565_at    | hypothetical protein MGC35043                                                                     |
| MGC39581          | 237020_at    | hypothetical protein MGC39581                                                                     |
| MGC42367          | 228067_at    | similar to 2010300C02Rik protein                                                                  |
| MGC72075          | 228600_x_at  | hypothetical protein MGC72075                                                                     |
| MGLL              | 225102_at    | monoglyceride lipase                                                                              |
| MLF1              | 204784_s_at  | myeloid leukemia factor 1                                                                         |
| MNS1              | 219703_at    | meiosis-specific nuclear structural 1                                                             |
| MOPT              | 226790_at    | protein containing single MORN motif in testis                                                    |
| MPP7              | 238778_at    | membrane protein, palmitoylated 7 (MAGUK p55 subfamily member 7)                                  |
| MS4A1             | 228592_at    | membrane-spanning 4-domains, subfamily A, member 1                                                |
|                   | 228599_at    |                                                                                                   |
| MS4A8B            | 224355_s_at  | membrane-spanning 4-domains, subfamily A, member 8B ; membrane-spanning 4-domains, subfamily A, m |
| MSLN              | 204885_s_at  | mesothelin                                                                                        |
| MSMB              | 207430_s_at  | microseminoprotein, beta-                                                                         |
|                   | 210297_s_at  |                                                                                                   |
| MUC1              | 213693_s_at  | mucin 1, transmembrane                                                                            |
|                   | 207847_s_at  |                                                                                                   |
| MUC13             | 218687_s_at  | mucin 13, epithelial transmembrane                                                                |
| MUC15             | 227238_at    | mucin 15                                                                                          |
| MUC16             | 220196_at    | mucin 16                                                                                          |
| MUC20             | 226622_at    | mucin 20                                                                                          |
|                   | 231941_s_at  |                                                                                                   |
| MUC4              | 217109_at    | mucin 4, tracheobronchial                                                                         |
|                   | 217110_s_at  |                                                                                                   |
|                   | 204895_x_at  |                                                                                                   |
| MUC5AC            | 214385_s_at  | mucin 5, subtypes A and C, tracheobronchial/gastric                                               |
|                   | 214303_x_at  |                                                                                                   |
| NBEA              | 221207_s_at  | neurobeachin                                                                                      |
|                   | 226439_s_at  |                                                                                                   |
| NEBL              | 203961_at    | nebullette                                                                                        |
| NME5              | 206197_at    | non-metastatic cells 5, protein expressed in (nucleoside-diphosphate kinase)                      |
| NQO1              | 210519_s_at  | NAD(P)H dehydrogenase, quinone 1                                                                  |
|                   | 201467_s_at  |                                                                                                   |
|                   | 201468_s_at  |                                                                                                   |
| NUCB2             | 203675_at    | nucleobindin 2                                                                                    |
| NYD-SP14          | 223962_at    | NYD-SP14 protein                                                                                  |
| PACRG             | 214204_at    | PARK2 co-regulated                                                                                |
| PAX5              | 221969_at    | Paired box gene 5 (B-cell lineage specific activator)                                             |
| PCSK5             | 205559_s_at  | proprotein convertase subtilisin/kexin type 5                                                     |
| PI3               | 203691_at    | peptidase inhibitor 3, skin-derived (SKALP) ; peptidase inhibitor 3, skin-derived (SKALP)         |
|                   | 41469_at     |                                                                                                   |
| PIGR              | 226147_s_at  | polymeric immunoglobulin receptor                                                                 |
|                   | 229659_s_at  |                                                                                                   |
| PLAC8             | 219014_at    | placenta-specific 8                                                                               |
| PLEKHH1           | 225726_s_at  | pleckstrin homology domain containing, family H (with MyTH4 domain) member 1                      |
| PPL               | 203407_at    | periplakin                                                                                        |
| PROM1             | 204304_s_at  | prominin 1                                                                                        |
| PRSS23            | 226279_at    | protease, serine, 23                                                                              |
| PRSS23            | 202458_at    | protease, serine, 23                                                                              |
| PTPRZ1            | 204469_at    | protein tyrosine phosphatase, receptor-type, Z polypeptide 1                                      |

|             |             |                                                                                                                                             |
|-------------|-------------|---------------------------------------------------------------------------------------------------------------------------------------------|
| RBM24       | 235004_at   | RNA binding motif protein 24                                                                                                                |
| RDHE2       | 238017_at   | epidermal retinal dehydrogenase 2                                                                                                           |
| RFX2        | 226872_at   | regulatory factor X, 2 (influences HLA class II expression)                                                                                 |
| RHCG        | 219554_at   | Rhesus blood group, C glycoprotein                                                                                                          |
| RNASE4      | 213397_x_at | ribonuclease, RNase A family, 4                                                                                                             |
| ROPN1L      | 223609_at   | ropporin 1-like                                                                                                                             |
| RRAD        | 204803_s_at | Ras-related associated with diabetes                                                                                                        |
|             | 204802_at   |                                                                                                                                             |
| RSHL3       | 233071_at   | radial spokehead-like 3                                                                                                                     |
| S100A2      | 204268_at   | S100 calcium binding protein A2                                                                                                             |
| S100A8      | 214370_at   | S100 calcium binding protein A8 (calgranulin A)                                                                                             |
| S100A9      | 203535_at   | S100 calcium binding protein A9 (calgranulin B)                                                                                             |
| S100P       | 204351_at   | S100 calcium binding protein P                                                                                                              |
| SAA1        | 214456_x_at | serum amyloid A1                                                                                                                            |
| SAA1 ; SAA2 | 208607_s_at | serum amyloid A1 ; serum amyloid A1 ; serum amyloid A2 ; serum amyloid A2                                                                   |
| SAA4        | 207096_at   | serum amyloid A4, constitutive                                                                                                              |
| SCEL        | 206884_s_at | sciellin                                                                                                                                    |
|             | 232056_at   |                                                                                                                                             |
| SCGB1A1     | 205725_at   | secretoglobin, family 1A, member 1 (uteroglobin)                                                                                            |
| SCGB2A1     | 205979_at   | secretoglobin, family 2A, member 1                                                                                                          |
| SCIN        | 1552365_at  | scinderin                                                                                                                                   |
| SCNN1A      | 203453_at   | sodium channel, nonvoltage-gated 1 alpha                                                                                                    |
| SELENBP1    | 214433_s_at | selenium binding protein 1 ; selenium binding protein 1                                                                                     |
| SERPINB1    | 228726_at   | Serpin peptidase inhibitor, clade B (ovalbumin), member 1                                                                                   |
| SERPINB11   | 1552463_at  | serpin peptidase inhibitor, clade B (ovalbumin), member 11                                                                                  |
| SERPINB13   | 211361_s_at | serpin peptidase inhibitor, clade B (ovalbumin), member 13                                                                                  |
|             | 217272_s_at |                                                                                                                                             |
| SERPINB2    | 204614_at   | serpin peptidase inhibitor, clade B (ovalbumin), member 2                                                                                   |
| SERPINB3    | 209720_s_at | serpin peptidase inhibitor, clade B (ovalbumin), member 3                                                                                   |
|             | 209719_x_at |                                                                                                                                             |
| SERPINB4    | 210413_x_at | serpin peptidase inhibitor, clade B (ovalbumin), member 4                                                                                   |
| SERPINB7    | 206421_s_at | serpin peptidase inhibitor, clade B (ovalbumin), member 7                                                                                   |
| SLC15A2     | 205316_at   | Solute carrier family 15 (H+/peptide transporter), member 2                                                                                 |
| SLC16A5     | 206600_s_at | solute carrier family 16 (monocarboxylic acid transporters), member 5                                                                       |
| SLC16A9     | 227506_at   | solute carrier family 16 (monocarboxylic acid transporters), member 9                                                                       |
| SLC22A16    | 232232_s_at | solute carrier family 22 (organic cation transporter), member 16                                                                            |
| SLC22A4     | 205896_at   | solute carrier family 22 (organic cation transporter), member 4                                                                             |
| SLC27A2     | 205768_s_at | solute carrier family 27 (fatty acid transporter), member 2                                                                                 |
|             | 205769_at   |                                                                                                                                             |
| SLC2A10     | 221024_s_at | solute carrier family 2 (facilitated glucose transporter), member 10 ; solute carrier family 2 (facilitated glucose transporter), member 10 |
| SLC44A4     | 205597_at   | solute carrier family 44, member 4                                                                                                          |
| SLC6A14     | 219795_at   | solute carrier family 6 (amino acid transporter), member 14                                                                                 |
| SLPI        | 203021_at   | secretory leukocyte peptidase inhibitor                                                                                                     |
| SORBS2      | 204288_s_at | sorbin and SH3 domain containing 2                                                                                                          |
| SPA17       | 205406_s_at | sperm autoantigenic protein 17                                                                                                              |
| SPAG17      | 233516_s_at | sperm associated antigen 17                                                                                                                 |
| SPAG6       | 210033_s_at | sperm associated antigen 6                                                                                                                  |
|             | 210032_s_at |                                                                                                                                             |
| SPATA18     | 229331_at   | spermatogenesis associated 18 homolog (rat)                                                                                                 |
| SPINK5      | 205185_at   | serine peptidase inhibitor, Kazal type 5                                                                                                    |
| SPRR1A      | 213796_at   | small proline-rich protein 1A                                                                                                               |
| SPRR3       | 218990_s_at | small proline-rich protein 3                                                                                                                |
| SRGAP3      | 1559333_at  | SLIT-ROBO Rho GTPase activating protein 3                                                                                                   |
| ST6GALNAC1  | 227725_at   | ST6 (alpha-N-acetyl-neuraminyl-2,3-beta-galactosyl-1,3)-N-acetylgalactosaminide alpha-2,6-sialyltransferase 1                               |
| STOML3      | 1553794_at  | stomatin (EPB72)-like 3                                                                                                                     |
| SYTL2       | 232914_s_at | synaptotagmin-like 2                                                                                                                        |
| TACSTD2     | 202286_s_at | tumor-associated calcium signal transducer 2                                                                                                |
| TEKT1       | 239216_at   | tektin 1                                                                                                                                    |
| TEKT2       | 210323_at   | tektin 2 (testicular)                                                                                                                       |
| TJP3        | 35148_at    | tight junction protein 3 (zona occludens 3)                                                                                                 |
| TMC5        | 240304_s_at | Transmembrane channel-like 5                                                                                                                |
|             | 219580_s_at |                                                                                                                                             |
|             | 222904_s_at |                                                                                                                                             |
| TMEM45B     | 230323_s_at | transmembrane protein 45B                                                                                                                   |
|             | 226226_at   |                                                                                                                                             |
| TNRC9       | 214774_x_at | trinucleotide repeat containing 9                                                                                                           |
| TP53INP2    | 224836_at   | tumor protein p53 inducible nuclear protein 2                                                                                               |
| TPPP        | 230104_s_at | brain-specific protein p25 alpha                                                                                                            |
| TSGA10      | 223838_at   | testis specific, 10                                                                                                                         |



|                  |              |                                                                                                          |
|------------------|--------------|----------------------------------------------------------------------------------------------------------|
| TSGA2            | 230093_at    | testis specific A2 homolog (mouse)                                                                       |
| TSPAN1           | 209114_at    | tetraspanin 1                                                                                            |
| TTC18            | 229170_s_at  | tetratricopeptide repeat domain 18                                                                       |
|                  | 229169_at    |                                                                                                          |
| TTC9             | 213172_at    | tetratricopeptide repeat domain 9                                                                        |
|                  | 213174_at    |                                                                                                          |
| TUBB2            | 204141_at    | tubulin, beta 2                                                                                          |
| UBXD3            | 238657_at    | UBX domain containing 3                                                                                  |
| UGT1A10 ; UGT1A8 | 215125_s_at  | UDP glucuronosyltransferase 1 family, polypeptide A10 ; UDP glucuronosyltransferase 1 family, polypeptic |
| UNQ473           | 226960_at    | DMC                                                                                                      |
| UPK1B            | 210065_s_at  | uroplakin 1B                                                                                             |
|                  | 210064_s_at  |                                                                                                          |
| URB              | 225242_s_at  | steroid sensitive gene 1                                                                                 |
| UTP14C           | 237168_at    | UTP14, U3 small nucleolar ribonucleoprotein, homolog C (yeast)                                           |
| VNN3             | 220528_at    | vanin 3                                                                                                  |
| WDR49            | 1554298_a_at | WD repeat domain 49                                                                                      |
| WDR66            | 230193_at    | WD repeat domain 66                                                                                      |
|                  | 1555007_s_at |                                                                                                          |
| WDR69            | 242162_at    | WD repeat domain 69                                                                                      |
| WDR78            | 229816_at    | WD repeat domain 78                                                                                      |
| WDRPUH           | 239916_at    | WD40-repeat protein upregulated in HCC                                                                   |
| WFDC2            | 203892_at    | WAP four-disulfide core domain 2                                                                         |
| YSK4             | 1555804_a_at | Yeast Sps1/Ste20-related kinase 4 ( <i>S. cerevisiae</i> )                                               |
| ZDS2F10          | 226926_at    | dermokine                                                                                                |
| ZMYND10          | 205714_s_at  | zinc finger, MYND-type containing 10                                                                     |
| ZMYND12          | 223636_at    | zinc finger, MYND-type containing 12                                                                     |
|                  | 238720_at    |                                                                                                          |
|                  | 236489_at    | Transcribed locus                                                                                        |
|                  | 239776_at    | MRNA; cDNA DKFZp686G0585 (from clone DKFZp686G0585)                                                      |
|                  | 1556003_a_at |                                                                                                          |
|                  | 1562921_at   |                                                                                                          |
|                  | 241898_at    | Transcribed locus, moderately similar to XP_517655.1 PREDICTED: similar to KIAA0825 protein [Pan tro     |
|                  | 241310_at    | Transcribed locus                                                                                        |
|                  | 243803_at    |                                                                                                          |
|                  | 222271_at    | Transcribed locus                                                                                        |
|                  | 240303_at    | CDNA FLJ44282 fis, clone TRACH2003516                                                                    |
|                  | 240293_at    |                                                                                                          |
|                  | 236666_s_at  | Similar to leucine rich repeat containing 10                                                             |
|                  | 243780_at    | CDNA FLJ46553 fis, clone THYMU3038879                                                                    |
|                  | 224348_s_at  |                                                                                                          |
|                  | 213929_at    | Homo sapiens, Similar to likely ortholog of yeast ARV1, clone IMAGE:4733238, mRNA                        |
|                  | 229810_at    | Transcribed locus, weakly similar to XP_496299.1 PREDICTED: hypothetical protein LOC148206 [Homo s       |
|                  | 231582_at    | Transcribed locus                                                                                        |
|                  | 235651_at    | Transcribed locus, moderately similar to NP_872301.1 hypothetical protein FLJ25224 [Homo sapiens]        |
|                  | 244313_at    | Transcribed locus                                                                                        |
|                  | 230043_at    |                                                                                                          |
|                  | 1568906_at   | CDNA clone IMAGE:4820483                                                                                 |
